# Supplementary material
Source: MDPI journal article supplement (https://www.mdpi.com/1424-8247/15/2/131)
Supplement: s1 [file s1]

Table S1. Syntax used in the database searches

| Database         | Search strategy                                                                                                                                                                                                                                                                                                                                                                                                                                                                                                                                                                                                                                                                                                                                                                                                                                                                                                                                                                                                                                                                                                                                                                                                                                                                                                                                                                                                                                                                                                                                                                                                                                                                                                                                                                                                                                                                                                                                                                                                                                                                                                                                                                                                                                                                                                                                                                                                                                                                                                                                                                                                                                                                                                                        | Results        |
|------------------|----------------------------------------------------------------------------------------------------------------------------------------------------------------------------------------------------------------------------------------------------------------------------------------------------------------------------------------------------------------------------------------------------------------------------------------------------------------------------------------------------------------------------------------------------------------------------------------------------------------------------------------------------------------------------------------------------------------------------------------------------------------------------------------------------------------------------------------------------------------------------------------------------------------------------------------------------------------------------------------------------------------------------------------------------------------------------------------------------------------------------------------------------------------------------------------------------------------------------------------------------------------------------------------------------------------------------------------------------------------------------------------------------------------------------------------------------------------------------------------------------------------------------------------------------------------------------------------------------------------------------------------------------------------------------------------------------------------------------------------------------------------------------------------------------------------------------------------------------------------------------------------------------------------------------------------------------------------------------------------------------------------------------------------------------------------------------------------------------------------------------------------------------------------------------------------------------------------------------------------------------------------------------------------------------------------------------------------------------------------------------------------------------------------------------------------------------------------------------------------------------------------------------------------------------------------------------------------------------------------------------------------------------------------------------------------------------------------------------------------|----------------|
| Cochrane Library | (prostate cancer) OR (statin)                                                                                                                                                                                                                                                                                                                                                                                                                                                                                                                                                                                                                                                                                                                                                                                                                                                                                                                                                                                                                                                                                                                                                                                                                                                                                                                                                                                                                                                                                                                                                                                                                                                                                                                                                                                                                                                                                                                                                                                                                                                                                                                                                                                                                                                                                                                                                                                                                                                                                                                                                                                                                                                                                                          | 76 references  |
| Embase           | ('prostate cancer'/exp OR 'prostate cancer' OR 'malignant prostate tumor' OR 'malignant prostate tumour' OR<br>'malignant prostatic tumor' OR 'malignant prostatic tumour' OR 'prostate gland cancer' OR 'prostate malignancy'<br>OR 'prostate malignant neoplasm' OR 'prostate malignant tumor' OR 'prostate malignant tumour' OR 'prostatic<br>cancer' OR 'prostatic malignancy') AND ('hydroxymethylglutaryl coenzyme a reductase inhibitor'/exp OR<br>'hydroxymethylglutaryl coenzyme a reductase inhibitor' OR 'hmg coa reductase inhibitor' OR 'hmg coa reductase<br>inhibitors' OR 'hmg coenzyme a reductase inhibitor' OR 'hmg-coa reductase inhibitors' OR<br>'hydroxymethylglutaryl coa reductase inhibitors' OR 'hydroxymethylglutaryl-coa reductase inhibitors' OR 'statin'<br>OR 'statins' OR 'vastatin' OR 'simvastatin' OR 'lovastatin' OR 'pravastatin' OR 'fluvastatin' OR 'atorvastatin' OR<br>'cerivastatin' OR 'rosuvastatin' OR 'pitavastatin') AND ('radiotherapy'/exp OR 'radiotherapy' OR 'bioradiant<br>therapy' OR 'bucky irradiation' OR 'bucky radiation' OR 'bucky radiotherapy' OR 'bucky ray' OR 'bucky ray<br>radiation' OR 'bucky therapy' OR 'fractionated radiotherapy' OR 'hemibody irradiation' OR 'hypophysis<br>irradiation' OR 'hypophysis radiation' OR 'irradiation therapy' OR 'irradiation treatment' OR 'lymphatic<br>irradiation' OR 'pituitary irradiation' OR 'radiation beam centration' OR 'radiation repair' OR 'radiation<br>therapy' OR 'radiation treatment' OR 'radio therapy' OR 'radio treatment' OR 'radiohypophysectomy' OR<br>'radiotherapy setup errors' OR 'radiotreatment' OR 'roentgen therapy' OR 'roentgen treatment' OR 'rontgen<br>therapy' OR 'therapeutic radiology' OR 'x radiotherapy' OR 'x ray therapy' OR 'x ray treatment' OR 'x-ray<br>therapy' OR 'External beam radiation therapy' or 'External beam radiation therapies' or 'External beam radiation<br>treatment' or 'External beam radiation treatments':ab,ti or 'external beam radiation' or 'external beam<br>radiotherapy' or 'external beam radiotherapies' or 'external beam therapy' or 'external beam therapies' or 'external<br>beam treatment' or 'external beam treatments' or 'EBRT' OR 'Internal radiation therapy' or 'Internal radiation<br>therapies' or 'Internal radiation treatment' or 'Internal radiation treatments' or 'brachytherapy' or<br>'brachytherapies' or 'internal radiotherapy' or 'internal radiotherapies' or 'IRT' OR 'prostatectomy'/exp OR<br>'prostatectomy' OR 'prostate adenectomy' OR 'prostate resection' OR 'prostatic adenectomy' OR 'radical<br>prostatectomy' OR 'total prostatectomy' OR 'androgen deprivation therapy'/exp OR 'androgen deprivation | 736 references |

|        |                                                                                                                                                                                                                                                                                                                                                                                                                                                                                                                                                                                                                                                                                                                                                                                                                                                                                                                                                                                                                                                                                                                                                                                                                                                                                                                                                                                                                                                                                                                                                                                                                                                                                                                                                                                                                                                                                                                                                                                                                                                                                                                                                                                                                                                                                 |                |
|--------|---------------------------------------------------------------------------------------------------------------------------------------------------------------------------------------------------------------------------------------------------------------------------------------------------------------------------------------------------------------------------------------------------------------------------------------------------------------------------------------------------------------------------------------------------------------------------------------------------------------------------------------------------------------------------------------------------------------------------------------------------------------------------------------------------------------------------------------------------------------------------------------------------------------------------------------------------------------------------------------------------------------------------------------------------------------------------------------------------------------------------------------------------------------------------------------------------------------------------------------------------------------------------------------------------------------------------------------------------------------------------------------------------------------------------------------------------------------------------------------------------------------------------------------------------------------------------------------------------------------------------------------------------------------------------------------------------------------------------------------------------------------------------------------------------------------------------------------------------------------------------------------------------------------------------------------------------------------------------------------------------------------------------------------------------------------------------------------------------------------------------------------------------------------------------------------------------------------------------------------------------------------------------------|----------------|
|        | therapy' OR 'adt' OR 'androgen suppression therapy' OR 'hormone therapy' OR 'androgen deprivation treatment' OR 'ast' OR 'androgen suppression treatment')                                                                                                                                                                                                                                                                                                                                                                                                                                                                                                                                                                                                                                                                                                                                                                                                                                                                                                                                                                                                                                                                                                                                                                                                                                                                                                                                                                                                                                                                                                                                                                                                                                                                                                                                                                                                                                                                                                                                                                                                                                                                                                                      |                |
| PubMed | <p>("Prostatic Neoplasms"[Mesh] OR "Prostate Neoplasms" or "Prostate Neoplasm" or "Prostatic Neoplasm" or "Prostate Cancer" or "Prostate Cancers" or "Cancer of the Prostate" or "Prostatic Cancer" or "Prostatic Cancers" or "Cancer of Prostate") AND ("Hydroxymethylglutaryl-CoA Reductase Inhibitors"[Mesh] OR "Hydroxymethylglutaryl CoA Reductase Inhibitors" or "HMG-CoA Reductase Inhibitor" or "HMG CoA Reductase Inhibitor" or "Statin" or "HMG-CoA Statins" or "HMG-CoA Reductase Inhibitors" or "HMG CoA Reductase Inhibitors" or "Hydroxymethylglutaryl-Coenzyme A Inhibitors" or "Hydroxymethylglutaryl-CoA Inhibitors" or "Hydroxymethylglutaryl-CoA Reductase Inhibitor" or "Hydroxymethylglutaryl CoA Reductase Inhibitor" or "Statins" or "simvastatin" or "lovastatin" or "pravastatin" or "fluvastatin" or "atorvastatin" or "cerivastatin" or "rosuvastatin" or "pitavastatin") AND ("Radiotherapy"[Mesh] OR "Radiotherapy" or "Radiotherapies" or "Radiation Therapy" or "Radiation Therapies" or "Radiation Treatment" or "Radiation Treatments" or "Targeted Radiotherapies" or "Targeted Radiotherapy" or "Targeted Radiation Therapy" or "Targeted Radiation Therapies" OR "External beam radiation therapy" or "External beam radiation therapies" or "External beam radiation treatment" or "External beam radiation treatments" or "external beam radiation" or "external beam radiotherapy" or "external beam radiotherapies" or "external beam therapy" or "external beam therapies" or "external beam treatment" or "external beam treatments" or "EBRT" OR "Internal radiation therapy" or "Internal radiation therapies" or "Internal radiation treatment" or "Internal radiation treatments" or "brachytherapy" or "brachytherapies" or "internal radiotherapy" or "internal radiotherapies" or "IRT" OR "Prostatectomy"[Mesh] OR "Prostatectomy" or "Prostatectomies" or "Suprapubic Prostatectomies" or "Suprapubic Prostatectomy" or "Retropubic Prostatectomies" or "Retropubic Prostatectomy" or "Definitive therapy" or "Definitive therapies" OR "Androgen deprivation therapy" or "androgen suppression therapy" or "ADT" or "AST" or "Androgen deprivation treatment" or "androgen suppression treatment" or "Hormone therapy")</p> | 164 references |

Table S2. Newcastle-Ottawa Scale quality assessment of the included observational studies

| Author, year                 | Selection |   |   |   | Comparability | Outcome |   |   | Total |
|------------------------------|-----------|---|---|---|---------------|---------|---|---|-------|
|                              | ①         | ② | ③ | ④ | ⑤             | ⑥       | ⑦ | ⑧ |       |
| Katz et al., 2010            | ★         | ★ |   | ★ | ★★            | ★       | ★ | ★ | 8     |
| Caon et al., 2014            | ★         | ★ | ★ | ★ | ★★            | ★       | ★ | ★ | 9     |
| Jung et al., 2015            |           | ★ | ★ | ★ | ★★            | ★       | ★ | ★ | 8     |
| Keskivali et al., 2016       | ★         | ★ | ★ | ★ | ★★            | ★       | ★ | ★ | 9     |
| Mikkelsen et al., 2017       | ★         | ★ | ★ | ★ | ★★            | ★       | ★ | ★ | 9     |
| Anderson-Carter et al., 2018 | ★         | ★ | ★ | ★ | ★★            | ★       | ★ | ★ | 9     |
| Joentausta et al., 2019      | ★         | ★ | ★ | ★ | ★★            | ★       | ★ | ★ | 9     |
| Li et al., 2019              | ★         | ★ | ★ | ★ | ★★            | ★       | ★ |   | 8     |
| Wu et al., 2019              | ★         | ★ | ★ | ★ | ★★            | ★       | ★ | ★ | 9     |
| Prabhu et al., 2020          | ★         | ★ | ★ | ★ |               | ★       | ★ | ★ | 7     |
| Hamilton et al., 2021        |           | ★ |   | ★ | ★★            | ★       | ★ | ★ | 7     |
| Peltomaa et al., 2021        | ★         | ★ | ★ | ★ | ★★            | ★       | ★ | ★ | 9     |

Notes. ①: representativeness of the exposed cohort; ②: selection of the non-exposed cohort; ③: ascertainment of exposure; ④: demonstration that the outcome of interest was not present at the start of the study; ⑤: comparability of cohorts on the basis of the design or analysis; ⑥: assessment of the outcome; ⑦: was follow-up long enough for outcomes to occur?; ⑧: adequacy of follow-up of cohorts

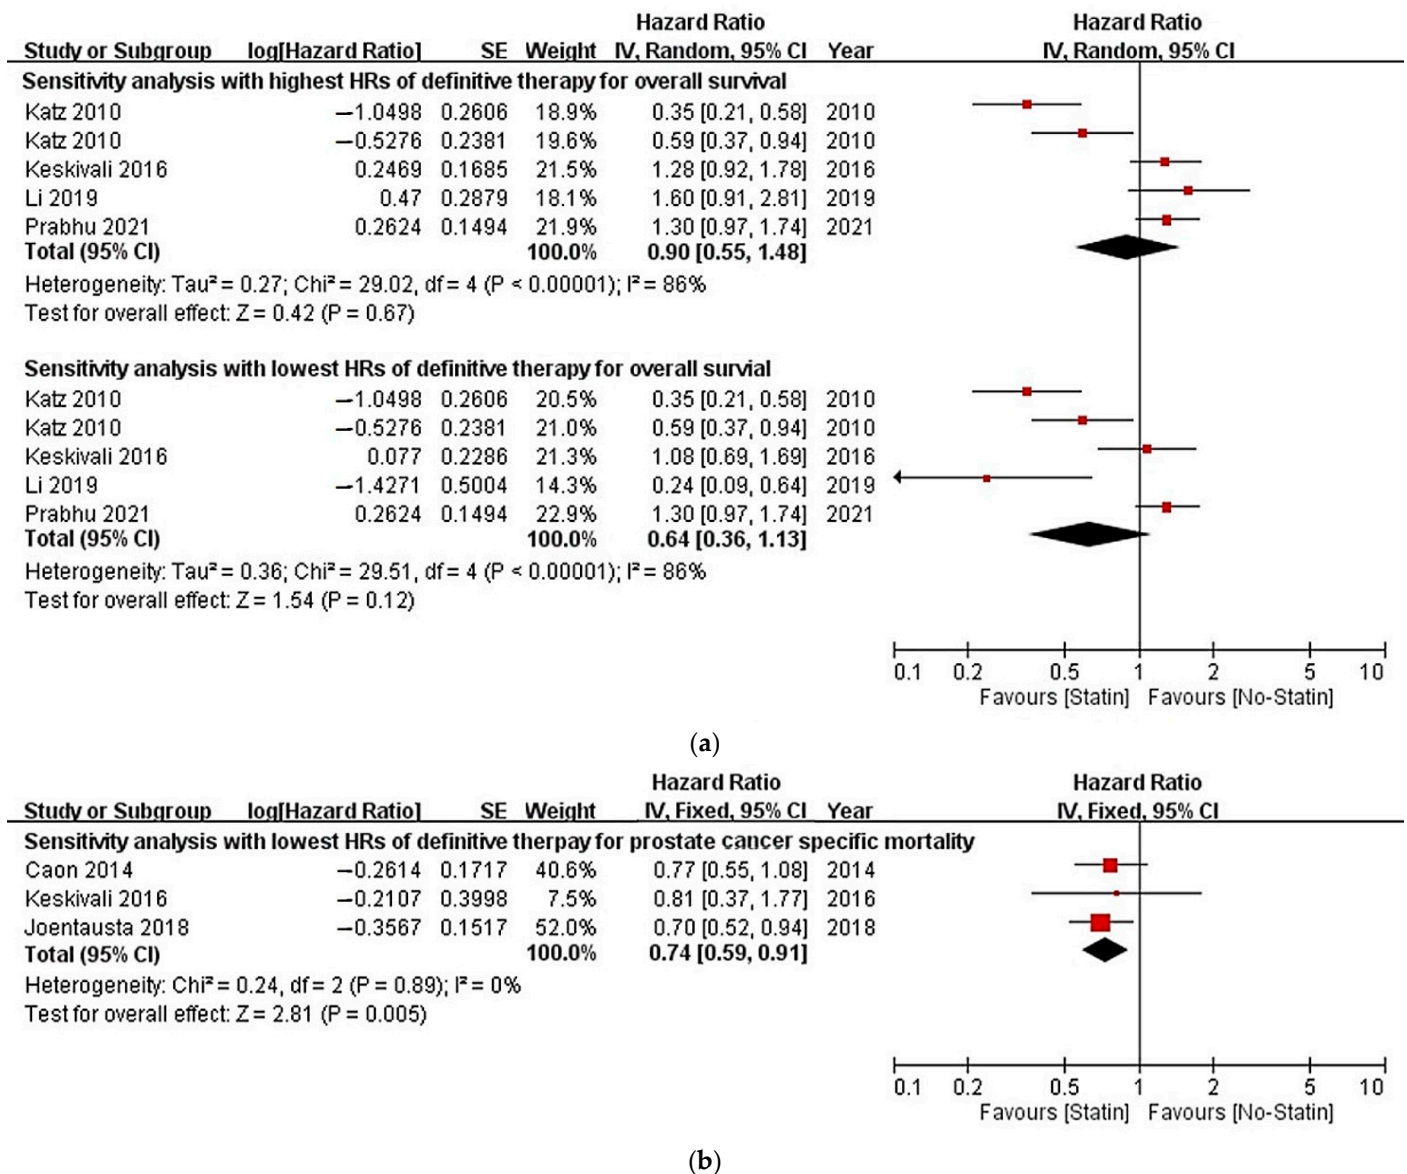

Figure S1. Sensitivity analysis of studies investigating the association between statin use with (a) **all-cause mortality** and (b) **prostate cancer (PCa)-specific mortality** of PCa patients receiving definitive therapy as their primary treatment.
